# Supplementary material for: Interfacial adsorption and dynamics of fluorotelomers with soil minerals – mechanistic insights
Source: Royal Society of Chemistry journal article supplement (doi:10.1039/d4en00465e), 2024-11-08
Supplement: d4en00465e1.pdf [file d4en00465e1.pdf]

## Interfacial Adsorption and Dynamics of Fluorotelomers with Soil Minerals – Mechanistic Insights

*Narasimhan Loganathan, Libby Ashby, Christina E. Schumm and Angela K. Wilson\**

Department of Chemistry and the MSU Center for PFAS Research, Michigan State University,  
East Lansing, Michigan 48824, United States

\*) **Corresponding author's email:** [akwilson@msu.edu](mailto:akwilson@msu.edu)

Includes: Figures: 13, Table – 2

### Surface construction:

The external surface of kaolinite, montmorillonite and illite were constructed by cleaving the structure along the (001) plane at the middle of the interlayer region. This cleaving procedure yielded two different basal surfaces for kaolinite: (i) a hydrophilic surface having hydroxyl groups; and (ii) a hydrophobic siloxane surface. Because of the 2:1 structure, the resulting basal surfaces of montmorillonite and illite have only their hydrophilic Si/Al tetrahedral layers exposed to the mesopore region. Importantly, after cleavage, each basal surface of the 2:1 mineral retains only one-half of the charging balancing cations. The total thickness of clay minerals is  $\sim 12$  Å,  $\sim 20$  Å and  $\sim 16$  Å for kaolinite, montmorillonite and illite, respectively. Regardless of the mineral substrate, the simulation cell consists of two clay layers with the mesopore regions saturated with bulk water density ( $\sim 20,000$  H<sub>2</sub>O molecules) with 16 6:2 FTS or 6:2 FTC molecules. The PFAS molecules were distributed into distinct regions of the H<sub>2</sub>O saturated mesopore regions and are also separated from each other by  $\sim 20$ -25 Å. A schematic illustration of the simulated montmorillonite with 6:2 FTS at time  $t=0$  ns is shown in Figure S1c.

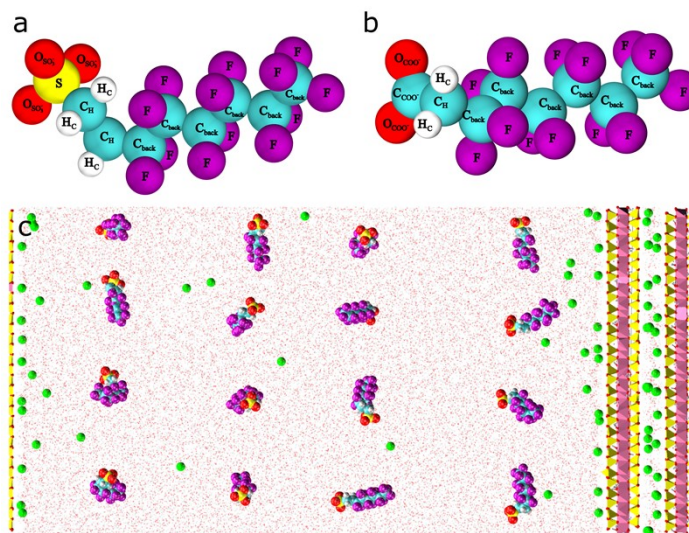

**Figure S1:** Pictorial representation of atom types associated to (a) FTS and (b) FTC and (c) schematic representation of simulated 6:2 FTS – montmorillonite model at time  $t= 0$  ns. Color codes: yellow – Si tetrahedra; pink – Al octahedra/tetrahedra; green spheres – Ca ions; yellow spheres – S; cyan spheres – C

(carbons bonded to H: C<sub>H</sub>; carboxyl carbon: C<sub>COO</sub>; backbone carbon C<sub>back</sub>); white spheres – H (hydrogens bonded to carbon: H<sub>C</sub>); purple spheres – F; red spheres – O (sulfonic oxygens O<sub>SO<sub>3</sub></sub> and carboxyl oxygens O<sub>COO</sub>). H<sub>2</sub>O molecules are shown in dotted representation.

**Table S1:** The cell dimensions used in the NVT (post-NPT) simulation runs for 6:2 FTS and 6:2 FTC systems in all three clay minerals are provided.

| Clay            |         | L <sub>x</sub> | L <sub>y</sub> | L <sub>z</sub> |
|-----------------|---------|----------------|----------------|----------------|
| Kaolinite       | 6:2 FTS | <b>62.26</b>   | <b>71.64</b>   | <b>148.59</b>  |
|                 | 6:2 FTC | 62.30          | 71.71          | 148.17         |
| Montmorillonite | 6:2 FTS | <b>62.25</b>   | <b>71.86</b>   | <b>148.83</b>  |
|                 | 6:2 FTC | 62.20          | 71.95          | 149.93         |
| Illite          | 6:2 FTS | <b>62.14</b>   | <b>71.66</b>   | <b>149.36</b>  |
|                 | 6:2 FTC | 62.17          | 71.67          | 148.54         |

### Atomic Density Profiles

#### Ca<sup>2+</sup> ions

The ADP's of Ca<sup>2+</sup> ions as functions of the distance normal to the basal surface vary substantially between the mineral surfaces. All Ca<sup>2+</sup> ions were associated with the hydrophobic siloxane region of kaolinite at distances of ~4.5 Å away from the surface (Figure 1c). In contrast, the ADP's of Ca<sup>2+</sup> ions in montmorillonite are composed of two peaks at distances ~2.1 Å and ~4.5 Å away from the basal surface representing inner- and outer-sphere coordination, respectively (Figure 2b and 2c). Due to the highly charged illite surface, almost all Ca<sup>2+</sup> ions are adsorbed at the basal surface at distances ~0.7 Å and ~2.1 Å away from the surface. Both the peaks exhibit inner-sphere coordination: (i) center of ditrigonal cavities; (ii) on top of the substituted tetrahedra (Figure 3b and 3c). The reported ADP's of Ca<sup>2+</sup> are in good agreement with our previous studies.<sup>1,2</sup>

#### H<sub>2</sub>O

As for Ca<sup>2+</sup> ions, the ADP's of H<sub>2</sub>O molecules as functions of the distance normal to the basal surface of clay minerals are not influenced by the presence of surface bound 6:2 FTS and 6:2 FTC molecules. However, it is evident from Figures 1a-1f that interfacial adsorption of H<sub>2</sub>O molecules varies substantially between the three mineral surfaces. For instance, the O<sub>H<sub>2</sub>O</sub> molecules exhibit three peaks (~2.5, 4.1 and 6.4 Å) at the hydroxyl surface of kaolinite, while there are only two prominent peaks (~2.7 Å and ~5.6 Å) at the siloxane surface of kaolinite along with a broad shoulder between ~3.0-4.5 Å. The well-defined peaks near the hydroxyl surface stem from the strong H-bonding interactions between 'H' of the surface hydroxyl groups and the O<sub>H<sub>2</sub>O</sub>. In contrast, due to the hydrophobic character of the siloxane surface, the H<sub>2</sub>O molecules typically exhibit broad distributions as shown in previous studies.<sup>2,3</sup>

It is evident from Figure 2 that the O<sub>H<sub>2</sub>O</sub> exhibits three peaks at distances ~2.7, 4.6 and 6.3 Å away from either basal surface of montmorillonite, irrespective of the fluorotelomer molecules. The presence of the H<sub>H<sub>2</sub>O</sub> peak at ~1.7 Å near the basal surface demonstrates that the surface adsorbed H<sub>2</sub>O molecules are coordinated through only one of their H<sub>H<sub>2</sub>O</sub> atoms which is in good agreement with previous studies. On the other hand, the H<sub>2</sub>O molecules in illite show four distinct and well-defined peaks for O<sub>H<sub>2</sub>O</sub> at distances ~2.6, 4.6, 5.3 and 6.5 Å from the basal surfaces along with a prominent shoulder at ~1.8 Å (Figure 3). As shown in previous studies, the H<sub>2</sub>O molecules are coordinated to the basal surface of illite, however, in two different configurations. The O<sub>H<sub>2</sub>O</sub> molecules closest to the surface (~1.8 Å) are located at the center of ditrigonal cavities with both

their  $H_{H_2O}$  atoms coordinating with the basal surface oxygen atoms. In contrast, the  $O_{H_2O}$  peak at 2.6 Å is located above the substituted Al tetrahedra and is coordinated through only one H-bonds to the surface. Importantly, irrespective of the clay minerals, the reported  $H_2O$  interfacial adsorption is similar to previous studies at relevant thermodynamic conditions.<sup>2-4</sup>

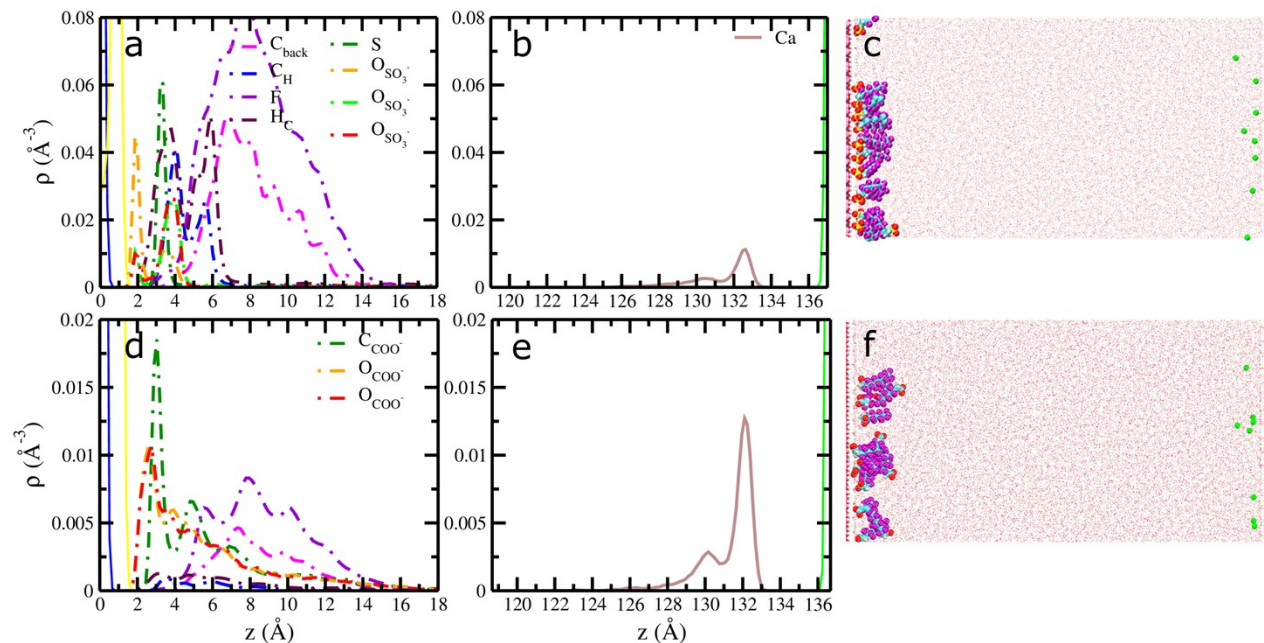

**Figure S2:** Computed ADPs of 6:2 FTS, 6:2 FTC and  $Ca^{2+}$  ions as functions of distance relative to surface normal of kaolinite. (a, b) – 6:2 FTS; (d, e) - 6:2 FTC. Schematic representation of 6:2 FTS (c) and 6:2 FTC (f) with kaolinite system at the end of data production run. Distance 0 is the mean position of hydroxyl ‘O’ atoms. ADP color codes: yellow – Si tetrahedra; pink – Al octahedra/tetrahedra; green spheres – Ca ions; yellow spheres – S; cyan spheres – C; white spheres – H; purple spheres – F; red spheres – O.  $H_2O$  molecules are shown in dotted representation.



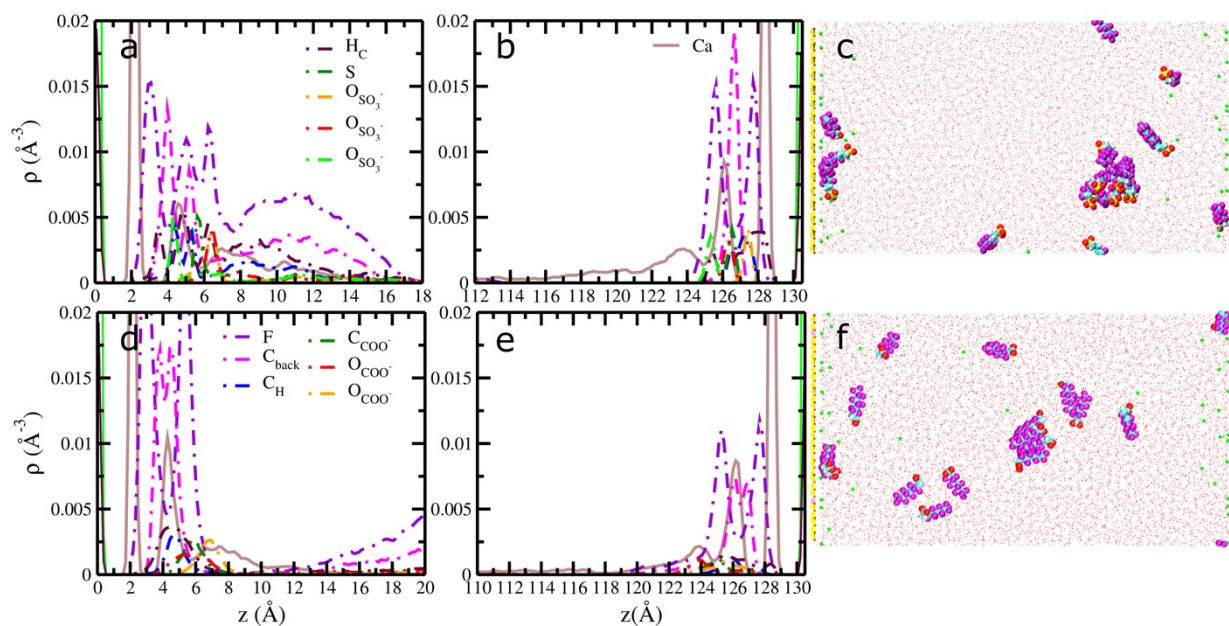

**Figure S3:** Computed ADPs of near surface interactions of 6:2 FTS, 6:2 FTC and  $\text{Ca}^{2+}$  ions as functions of distance relative to clay surface normal of montmorillonite. (a,b) - 6:2 FTS; (d,e) - 6:2 FTC. Schematic representations of 6:2 FTS (c) and 6:2 FTC (f) with montmorillonite system at the end of data production run. Distance 0 is the mean position of tetrahedral 'O' atoms. ADP color codes: yellow – Si tetrahedra; pink – Al octahedra/tetrahedra; green spheres – Ca ions; yellow spheres – S; cyan spheres – C; white spheres – H; purple spheres – F; red spheres – O.  $\text{H}_2\text{O}$  molecules are shown in dotted representation.

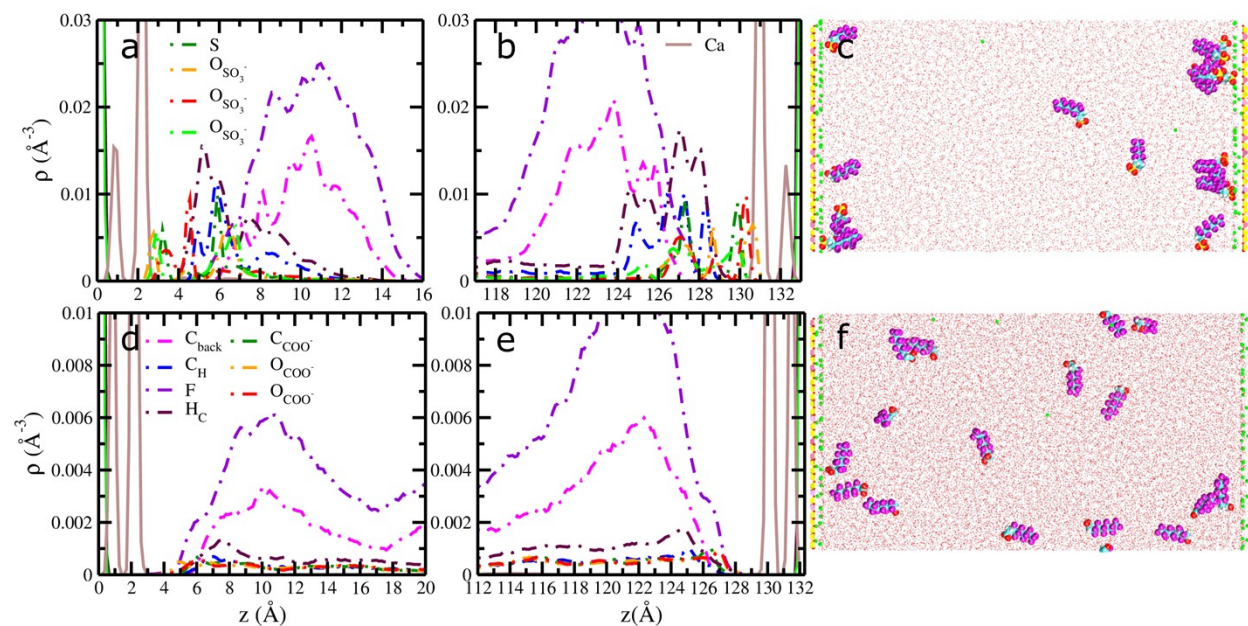

**Figure S4:** Computed ADPs of near surface interactions of 6:2 FTS, 6:2 FTC and  $\text{Ca}^{2+}$  ions as functions of distance relative to clay surface normal of illite. (a,b) - 6:2 FTS; (d,e) - 6:2 FTC. Schematic representations of 6:2 FTS (c) and 6:2 FTC (f) with illite system at the end of data production run. Distance 0 is the mean position of tetrahedral 'O' atoms. ADP color codes: yellow – Si tetrahedra; pink – Al octahedra/tetrahedra; green spheres – Ca ions; yellow spheres – S; cyan spheres – C; white spheres – H; purple spheres – F; red spheres – O.  $\text{H}_2\text{O}$  molecules are shown in dotted representation.

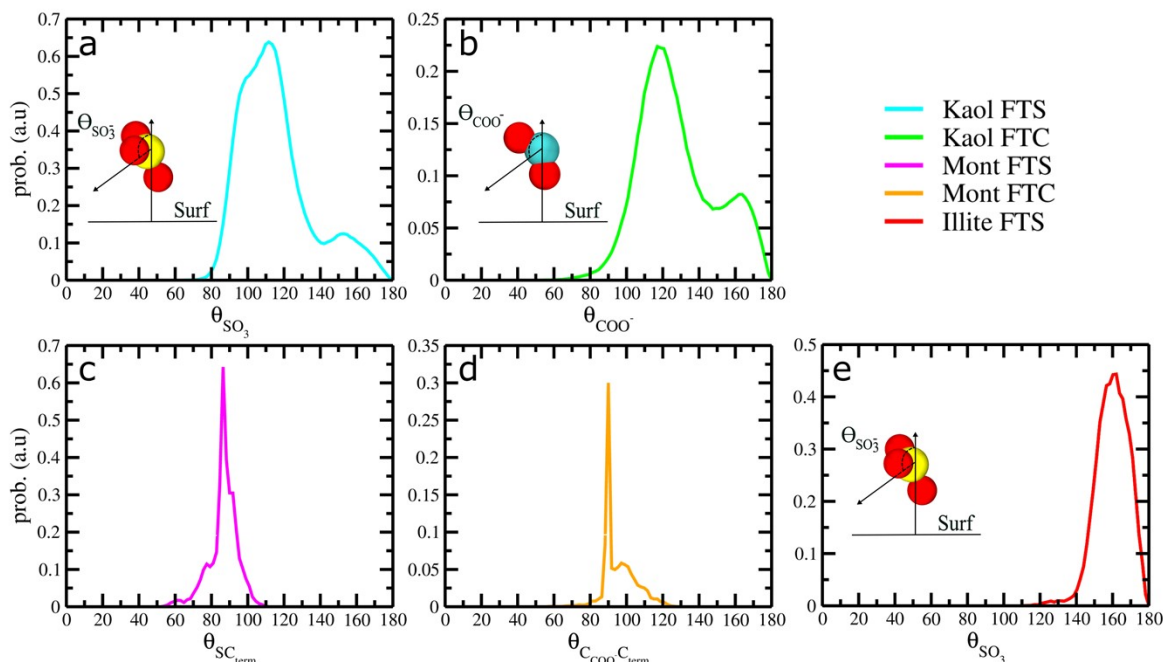

**Figure S5:** Computed orientation distributions of only the surface-adsorbed 6:2 FTS and 6:2 FTC at the basal surfaces of kaolinite (a,b), montmorillonite (c,d) and illite (e).  $\theta_{\text{SO}_3}$  is the angle between the vector bisecting the  $\text{SO}_3$  groups of 6:2 FTS molecules with respect to the surface normal of a clay mineral (kaolinite/illite).  $\theta_{\text{COO}^-}$  is the angle between the vector bisecting the  $\text{COO}^-$  groups of 6:2 FTC molecules with respect to the surface normal of kaolinite.  $\theta_{\text{SC}_{\text{term}}}$  represents the angle between the vector made by the terminal  $\text{S}_{\text{SO}_3}$  and the  $\text{C}_{\text{CF}_3}$  of the backbone of 6:2 FTS molecules with respect to the surface normal of montmorillonite.  $\theta_{\text{CCOO-C}_{\text{term}}}$  represents the angle between the vector made by the terminal  $\text{C}_{\text{COO}}$  and the  $\text{C}_{\text{CF}_3}$  of the backbone of 6:2 FTC molecules with respect to the surface normal of montmorillonite.

### Orientation of surface adsorbed $\text{H}_2\text{O}$ molecules:

The computed orientation of surface bound  $\text{H}_2\text{O}$  dipole vectors with respect to the surface normal shows completely different interfacial behavior between the three types of clay minerals (Figure S6). Importantly, the surface adsorbed water molecules are not influenced by the presence of 6:2 FTS/6:2 FTC molecules at the surface. For instance, the  $\text{H}_2\text{O}$  dipole vectors at the hydroxyl surface of kaolinite exhibit two peaks demonstrating the two different types of  $\text{H}_2\text{O}$  orientation (Figure S6a). The peak at  $\sim 22^\circ$  represents  $\text{H}_2\text{O}$  dipole vectors pointed away from the basal surface while the peak at  $\sim 126^\circ$  represents  $\text{H}_2\text{O}$  molecules with their dipole vectors pointed towards the hydroxyl surface exhibiting H-bonding interactions. In contrast, the  $\text{H}_2\text{O}$  molecules at the siloxane surface have their dipoles predominantly oriented at  $\theta_1 \sim 54^\circ$  which could be attributed to the hydrophobic character of the basal surface as shown in previous studies.<sup>2,3</sup> Similarly, the surface adsorbed  $\text{H}_2\text{O}$  molecules in montmorillonite predominantly have dipoles that are pointed towards their basal surface with a peak centered at  $\sim 120^\circ$ . The peak at  $\sim 60^\circ$  represents a similar  $\text{H}_2\text{O}$  orientation on the other basal surface of montmorillonite (Figure S6b). On the other hand, the  $\text{H}_2\text{O}$  dipole vectors in illite are largely oriented at  $\sim 160^\circ$  which could be attributed to  $\text{H}_2\text{O}$  molecules located at the center of ditrigonal cavities and is consistent with our previous studies on PFAS (Figure S6c).<sup>2</sup> The peak at  $\sim 20^\circ$  represents similar  $\text{H}_2\text{O}$  orientation on the basal surface of the other basal surface of illite.

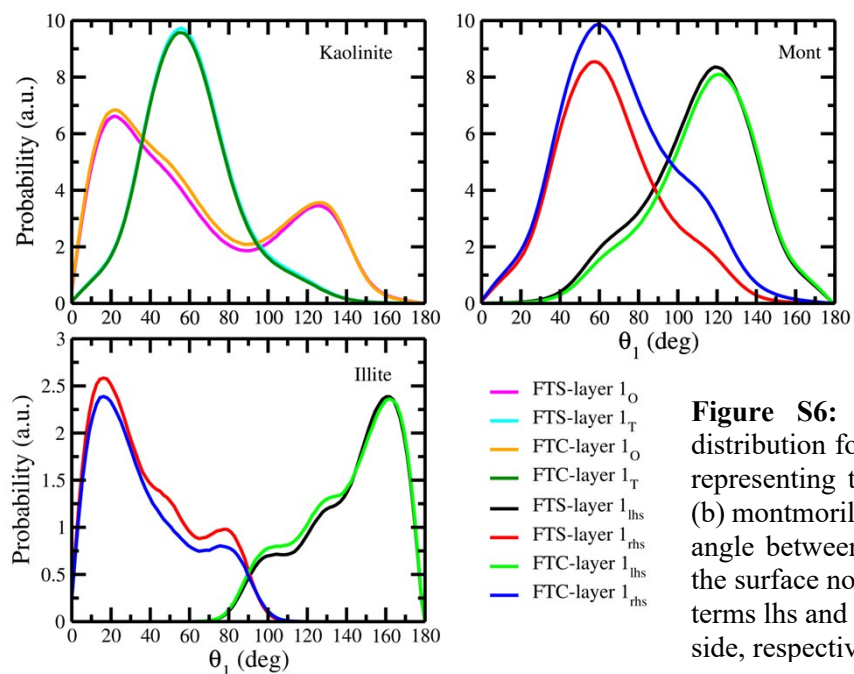

**Figure S6:** Calculated dipole orientation distribution for surface bound H<sub>2</sub>O molecules representing the first layers on (a) kaolinite, (b) montmorillonite, (c) and illite surface.  $\theta_1$  is angle between the dipole vector of H<sub>2</sub>O and the surface normal of each clay substrate. The terms lhs and rhs represent left and right-hand side, respectively.

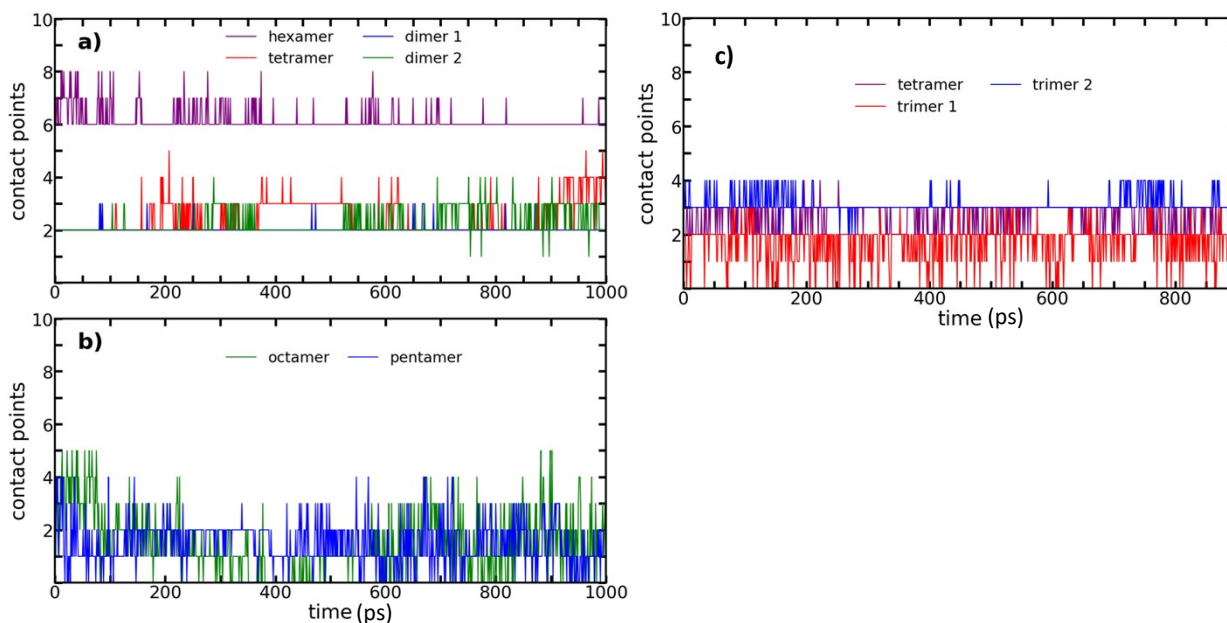

**Figure S7:** Average contact from each PFAS cluster with clay minerals as functions of time. (a) kaolinite – 6:2 FTS, (b) kaolinite – 6:2 FTC, (c) and illite – 6:2 FTC surface.



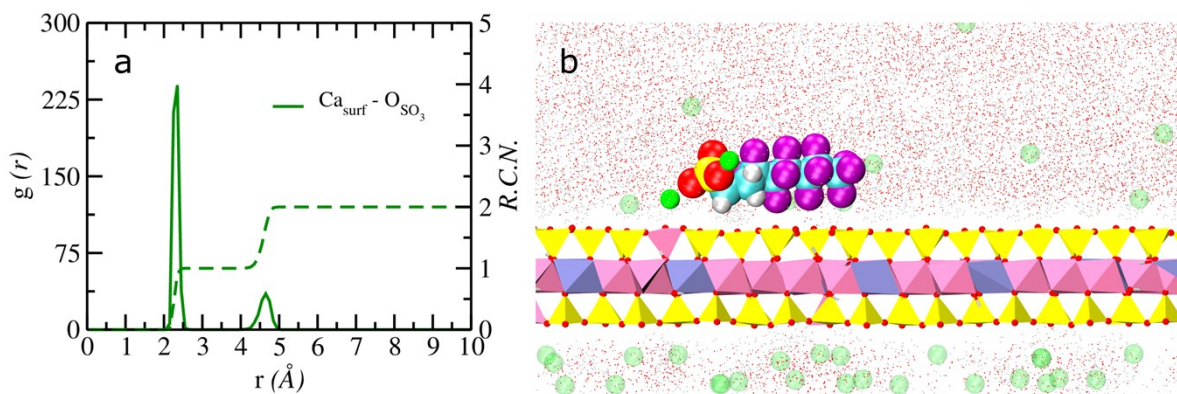

**Figure S8:** Pictorial representation of surface adsorbed 6:2 FTS coordinating to two different  $\text{Ca}^{2+}$  ions at the basal surface of montmorillonite. Color codes: yellow – Si tetrahedra; pink – Al octahedra/tetrahedra; gray – Mg octahedra; green spheres – Ca ions; yellow spheres – S; cyan spheres – C; white spheres – H; purple spheres – F; red spheres – O. Ca ions in transparent and  $\text{H}_2\text{O}$  molecules are shown in dotted representation.

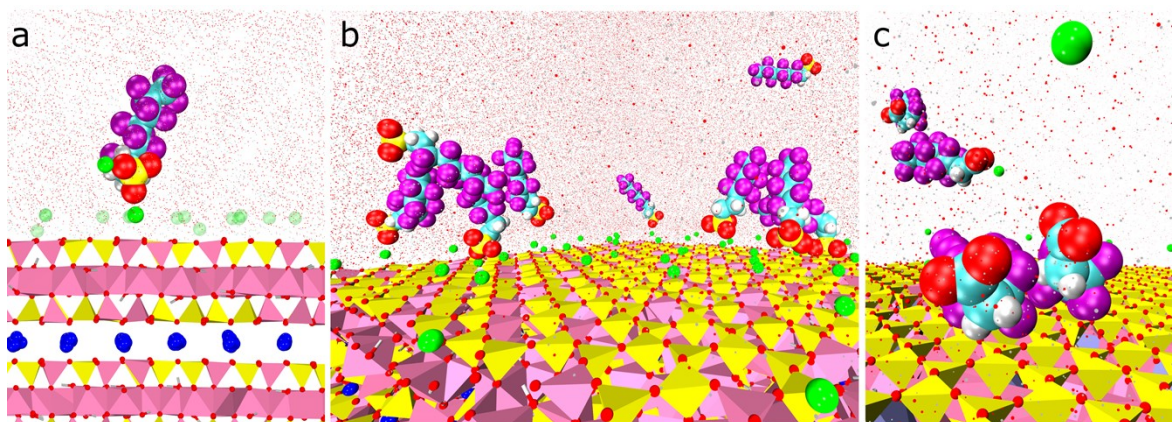

**Figure S9:** Pictorial representation of surface adsorbed 6:2 FTS coordinating to  $\text{Ca}^{2+}$  ions at the basal surface of illite and oriented perpendicular to the surface. a) 6:2 FTS coordinating to two different  $\text{Ca}^{2+}$  ions; b) 6:2 FTS molecules at one of the basal surfaces of illite. Color codes: yellow – Si tetrahedra; pink – Al octahedra/tetrahedra; green spheres – Ca ions; yellow spheres – S; cyan spheres – C; white spheres – H; purple spheres – F; red spheres – O. Ca ions in transparent and  $\text{H}_2\text{O}$  molecules are shown in dotted representation.

### Interfacial coordination of $\text{Ca}^{2+}$ ions

The coordination of  $\text{Ca}^{2+}$  ions vary significantly between montmorillonite and illite (Figure 2 and 3). The running coordination number (R.C.N.) numbers of  $\text{Ca}^{2+}$  ions with the basal surface oxygen ( $\text{O}_{\text{surf}}$ ) atoms of montmorillonite are smaller than the corresponding values in illite (Figure S10a). This difference is primarily because the  $\text{Ca}^{2+}$  ions in montmorillonite are predominantly located on top of the substituted tetrahedral sites resulting in a value of  $\sim 2.0$ . In contrast, the ability of  $\text{Ca}^{2+}$  ions to adsorb both at the center of ditrigonal cavities and also on top of the substituted tetrahedral sites results in a higher R.C.N. of nearly 3.0. Since the  $\text{Ca}^{2+}$  ions are not influenced by the presence of kaolinite, their interfacial coordination behavior is not reported here.

It is evident from Figure S10b, that the coordination of  $\text{Ca}^{2+}$  with  $\text{H}_2\text{O}$  changes significantly between different clay minerals. For instance, the R.C.N. of  $\text{Ca}^{2+}$  is 8.0 which is consistent with

previous studies on bulk solution phases.<sup>5</sup> However, the R.C.N between  $\text{Ca}^{2+}$  and  $\text{H}_2\text{O}$  decreases to  $\sim 6.0$  and  $\sim 5.0$  in montmorillonite and illite, respectively. Such decreases in the R.C.N. are primarily due to the  $\text{Ca}^{2+}$  coordination with the basal surface oxygen atoms.

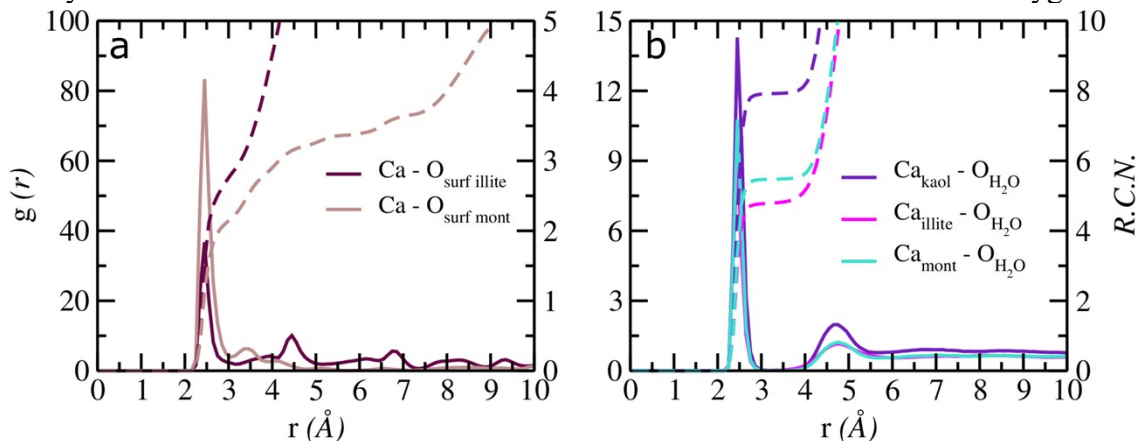

**Figure S10:** Radial distribution functions ( $g(r)$ , solid lines) and corresponding running coordination number (RCN, dashed lines) for  $\text{Ca}^{2+}$  ions at the surfaces of montmorillonite and illite (a) and with  $\text{H}_2\text{O}$  molecules in kaolinite, montmorillonite and illite (b).

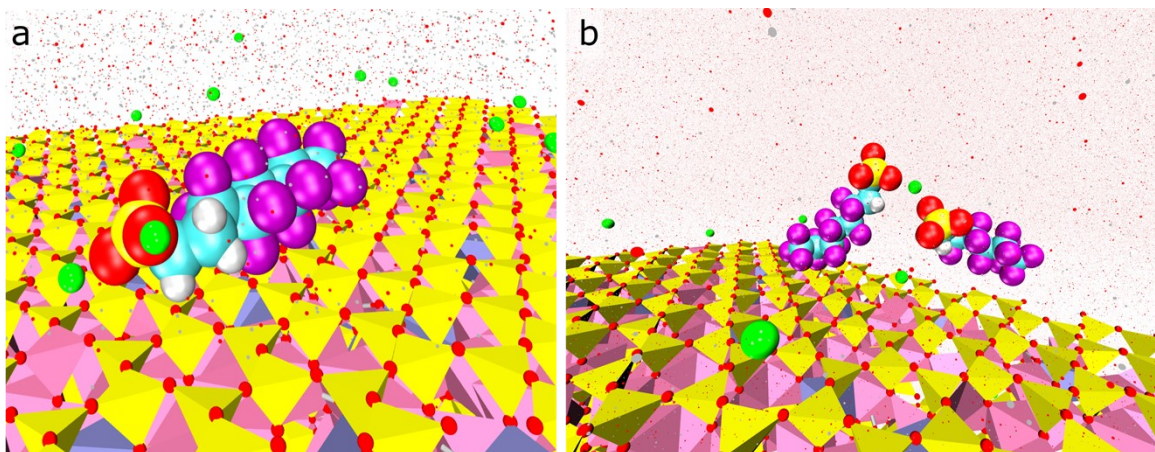

**Figure S11:** Pictorial representation of surface adsorbed 6:2 FTS (a) monomer coordinated to two different  $\text{Ca}^{2+}$  ions in montmorillonite; (b) dimer coordinated to  $\text{Ca}^{2+}$  ions away from the surface. For the sake of clarity,  $\text{H}_2\text{O}$  molecules are shown in dotted representation.



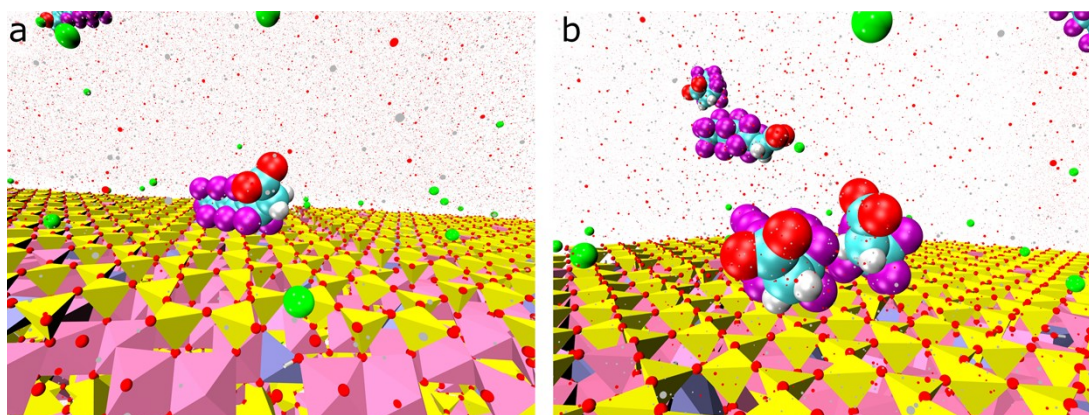

**Figure S12:** Pictorial representation of surface adsorbed 6:2 FTC a) monomer and b) dimer at the basal surface of montmorillonite. For the sake of clarity, H<sub>2</sub>O molecules are shown in dotted representation.

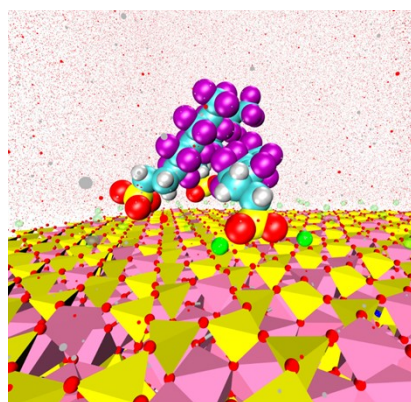

**Figure S13:** Pictorial representation of surface adsorbed 6:2 FTS trimer coordinated to two different Ca<sup>2+</sup> ions at the basal surface of illite. For the sake of clarity, H<sub>2</sub>O molecules are shown in dotted representation.

| System                | Avg  | Mono.              | Dim.               | Trim.              | Tetra.             | Penta.             | Hexa.              | Octa.              |
|-----------------------|------|--------------------|--------------------|--------------------|--------------------|--------------------|--------------------|--------------------|
| Kaolinite - FTS       | 0.32 | 0.32 ±<br>0.02 (2) | 0.63 ±<br>0.01 (2) | -                  | 0.17 ±<br>0.01 (1) | -                  | 0.15 ±<br>0.01 (1) | -                  |
| Kaolinite - FTC       | 2.20 | 0.48 ±<br>0.02 (3) | -                  | -                  | -                  | 3.36 ±<br>0.03 (1) | -                  | 2.13 ±<br>0.02 (1) |
| Montmorillonite - FTS | 1.09 | 0.64 ±<br>0.01 (2) | 1.53 ±<br>0.02 (1) | -                  | -                  | -                  | -                  | -                  |
| Montmorillonite - FTC | 4.92 | 0.49 ±<br>0.12 (1) | 7.10 ±<br>0.10 (1) | -                  | -                  | -                  | -                  | -                  |
| Illite - FTS          | 1.09 | 1.85 ±<br>0.02 (3) | -                  | 0.44 ±<br>0.02 (2) | 1.51 ±<br>0.02 (1) | -                  | -                  | -                  |

**Table S2:** Mean and cluster-size dependent diffusion coefficients ( $10^{-10}$  m<sup>2</sup>/s) of surface adsorbed 6:2 FTS and 6:2 FTC in all three clay minerals. The values in parentheses represent the number of clusters.

### **Further simulation and analysis details**

The total energy ( $E_{tot}$ ) for each system is computed as the sum of all intra- and intermolecular forces acting on each atom. Intramolecular potentials are harmonic for both bond stretches ( $E_{bonds}$ ) and angle bending ( $E_{angles}$ ), and the dihedral motion ( $E_{dihedrals}$ ) is defined using a cosine series description. The intermolecular interactions are Coulombic interactions ( $E_{Coul}$ ) and van der Waals forces ( $E_{vdW}$ ). Interactions between different atom types are calculated with the Lorentz-Berthelot combination rules.

$$E_{tot} = E_{bonds} + E_{angles} + E_{dihedrals} + E_{Coul} + E_{vdW} \quad \#(1)$$

Functional forms and parameters used for our simulations are obtained from ClayFF (including revised) and AMBER forcefields.<sup>6,7</sup>

All atomic density profiles provided in the main manuscript and SI are defined as the average count of atoms ( $N_{atom}$ ) relative to clay surface normal. Atomic densities ( $\rho_{atom}(z)$ ) are determined for each atom type in bins of size  $\Delta z$  along the z-dimension and normalized by the total system volume ( $V$ ).

$$\rho_{atom}(z) = \frac{\langle N_{atom}(\Delta z) \rangle}{V} \quad \#(2)$$

Radial distribution functions were calculated as the average density of one atom type to another chosen reference type. The average number of atom type  $j$  are computed for radial distances relative to reference atom type  $i$  ( $r_{ij}$ ), and is represented by  $\langle N_{ij} \rangle$ . The density of  $j$  atoms is represented by  $\rho$

$$g(r_{ij}) = \frac{\langle N_{ij} \rangle}{4\pi\rho r_{ij}} \quad \#(3)$$

Mean-square displacements were calculated for FT molecules and H<sub>2</sub>O in each system to find diffusion coefficients,  $D$ . The dimensionality of the system is represented by  $d$ , while  $t$  is time and  $\langle x^2 \rangle$  is the mean-square displacement.

$$D = \frac{\langle x^2 \rangle}{2dt} \#(4)$$

## References

- 1 B. F. N. W, Brice F. Ngouana W., 2014.
- 2 C. E. Schumm, N. Loganathan and A. K. Wilson, Influence of Soil Minerals on the Adsorption, Structure, and Dynamics of GenX, *ACS ES&T Water*, 2023, **3**, 2659–2670.
- 3 N. Loganathan and A. K. Wilson, Adsorption, Structure, and Dynamics of Short- and Long-Chain PFAS Molecules in Kaolinite: Molecular-Level Insights, *Environ Sci Technol*, 2022, **56**, 8043–8052.
- 4 K. D. Papavasileiou, V. K. Michalis, L. D. Peristeras, M. Vasileiadis, A. Striolo and I. G. Economou, Molecular Dynamics Simulation of Water-Based Fracturing Fluids in Kaolinite Slit Pores, *Journal of Physical Chemistry C*, 2018, **122**, 17170–17183.
- 5 N. Loganathan, A. O. Yazaydin, G. M. Bowers, A. G. Kalinichev and R. J. Kirkpatrick, Cation and Water Structure, Dynamics, and Energetics in Smectite Clays: A Molecular Dynamics Study of Ca-Hectorite, *Journal of Physical Chemistry C*, 2016, **120**, 12429–12439.
- 6 J. Wang, R. M. Wolf, J. W. Caldwell, P. A. Kollman and D. A. Case, Development and testing of a general amber force field, *J Comput Chem*, 2004, **25**, 1157–1174.
- 7 R. T. Cygan, J. J. Liang and A. G. Kalinichev, Molecular models of hydroxide, oxyhydroxide, and clay phases and the development of a general force field, *Journal of Physical Chemistry B*, 2004, **108**, 1255–1266.
